# Supplementary material for: Magnetic graphene oxide nanocomposites as an effective support for lactase immobilization with improved stability and enhanced photothermal enzymatic activity
Source: Royal Society of Chemistry journal article supplement (doi:10.1039/d0nj06260j), 2021-01-01
Supplement: d0nj06260j1.pdf [file d0nj06260j1.pdf]

## Supporting Information

**Magnetic graphene oxide nanocomposite as an effective support for lactase immobilization with improved stability and photothermal enhanced enzymatic activity**

Yinglong Li, Buchuan Wang, Minjie Wu, Weiwei Huan\*, and Jie Li\*

Zhejiang Provincial Key Laboratory of Chemical Utilization of Forestry Biomass,  
Zhejiang A & F University, Lin'an, 311300, China.

---

Abbreviation in the figure legends of Fig. S1 to S10.

GO: Graphene oxide; mGO: Fe<sub>3</sub>O<sub>4</sub>-immobilized GO; mGE: Polyethyleneimine-modified mGO; mGP: Pyrene butyric acid-modified mGO; mGPP: Polyethyleneimine-modified mGP; mGO-Lactase: Lactase-immobilized mGO; mGE-Lactase: Lactase-immobilized mGE; mGPP-Lactase: Lactase-immobilized mGPP.

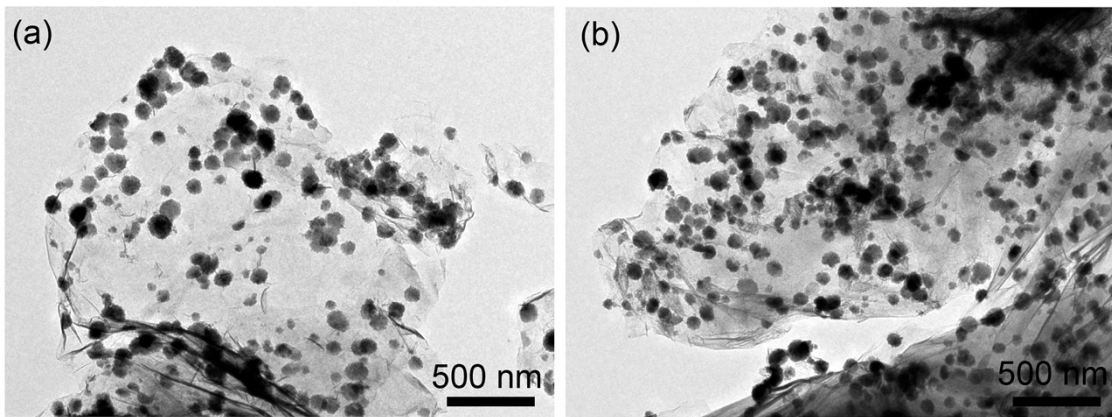

**Fig. S1** TEM micrographs of mGO.

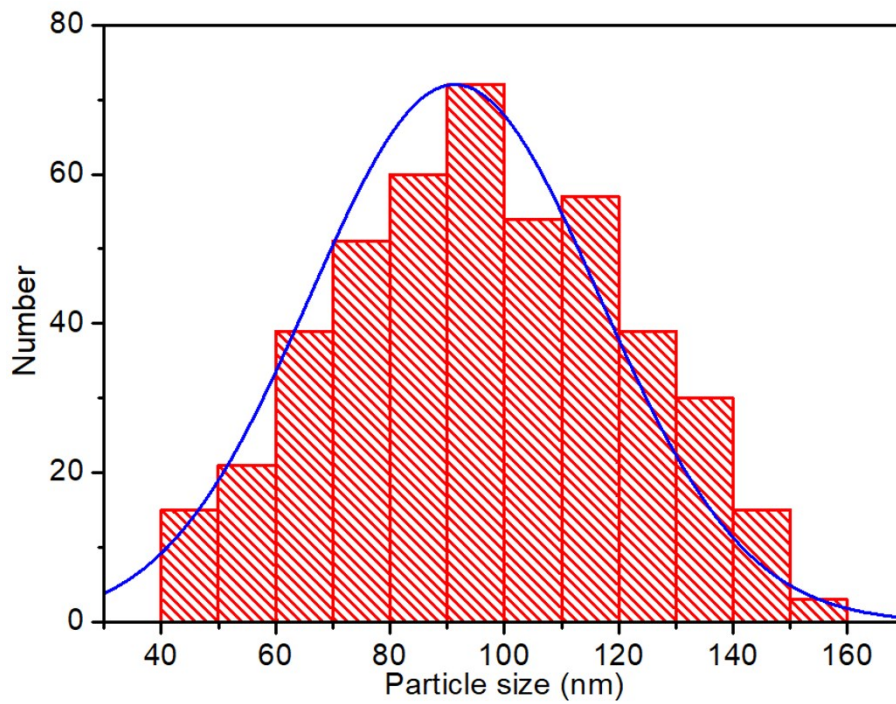

**Fig. S2** The particle-size distribution of  $\text{Fe}_3\text{O}_4$  nanoparticles on mGO and fitting Gaussian curve.

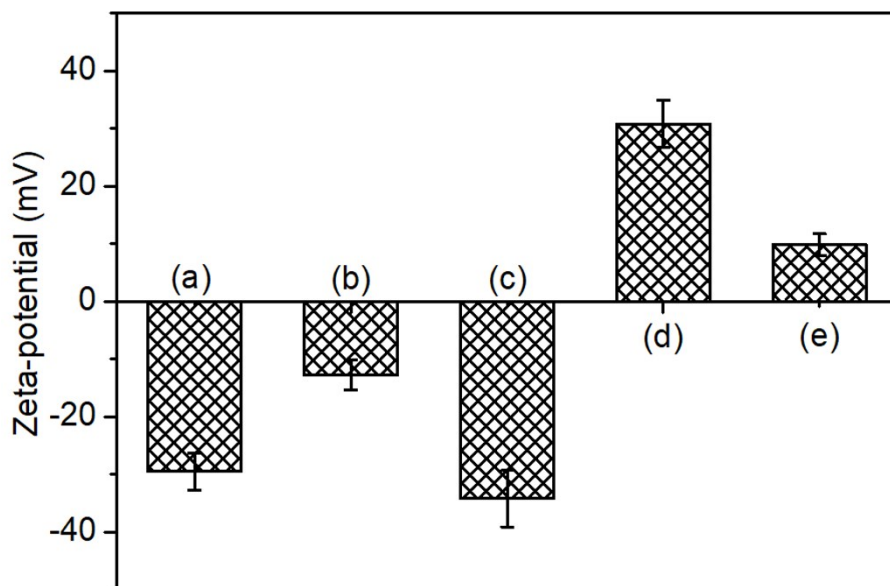

**Fig. S3** Surface zeta potentials of GO (a), mGO (b), mGP (c), mGPP (d), and mGPP-Lactase (e).

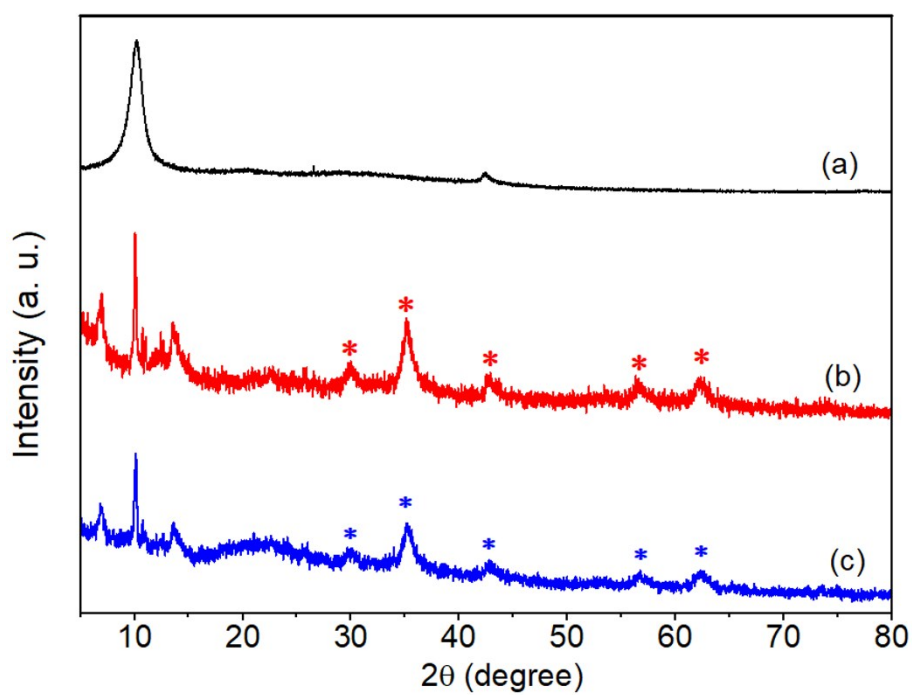

**Fig. S4** XRD patterns of GO (a), mGO (b), and mGPP-Lactase (c).

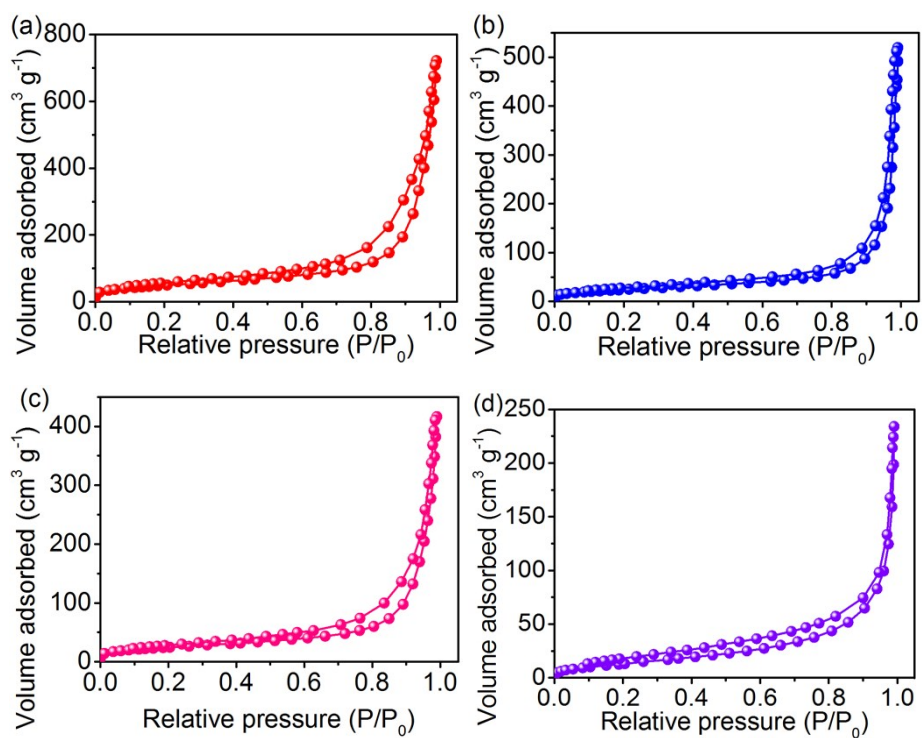

**Fig. S5** Nitrogen adsorption-desorption isotherms of GO (a), mGO (b), mGP (c), and mGPP (d).

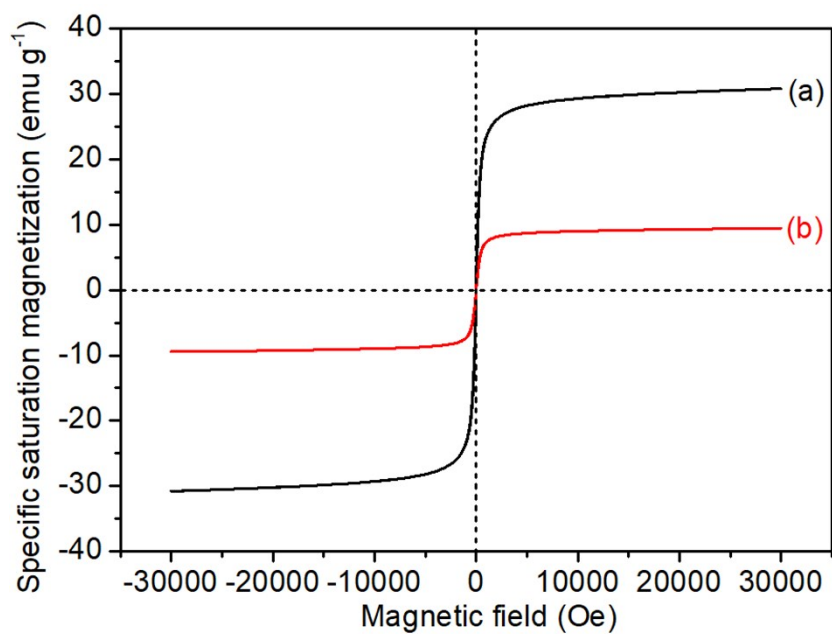

**Fig. S6** Magnetic hysteresis loops of mGO (a), and mGPP-Lactase (b).

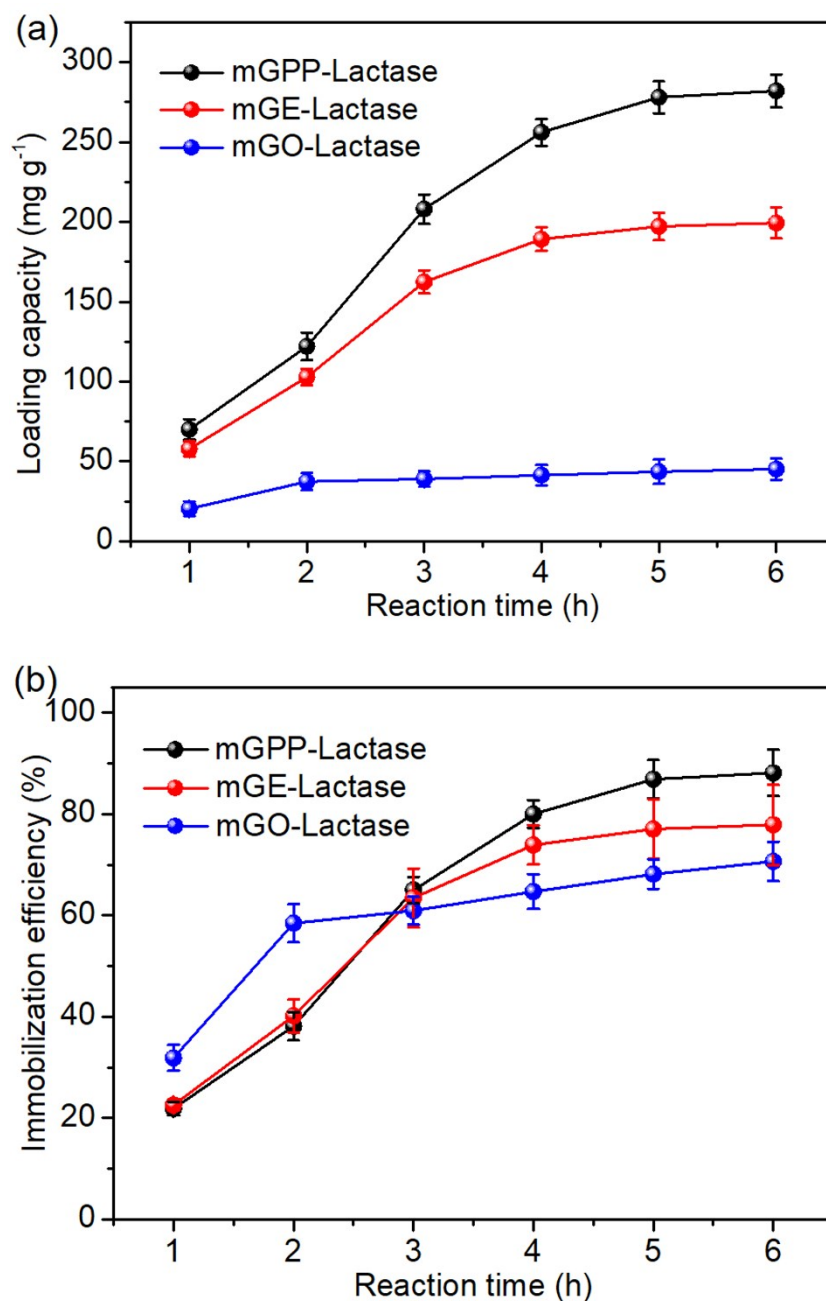

**Fig. S7** (a) Effect of reaction time on loading capacities of mGO-Lactase, mGE-Lactase, and mGPP-Lactase, (b) effect of reaction time on immobilization efficiencies of mGO-Lactase, mGE-Lactase, and mGPP-Lactase.

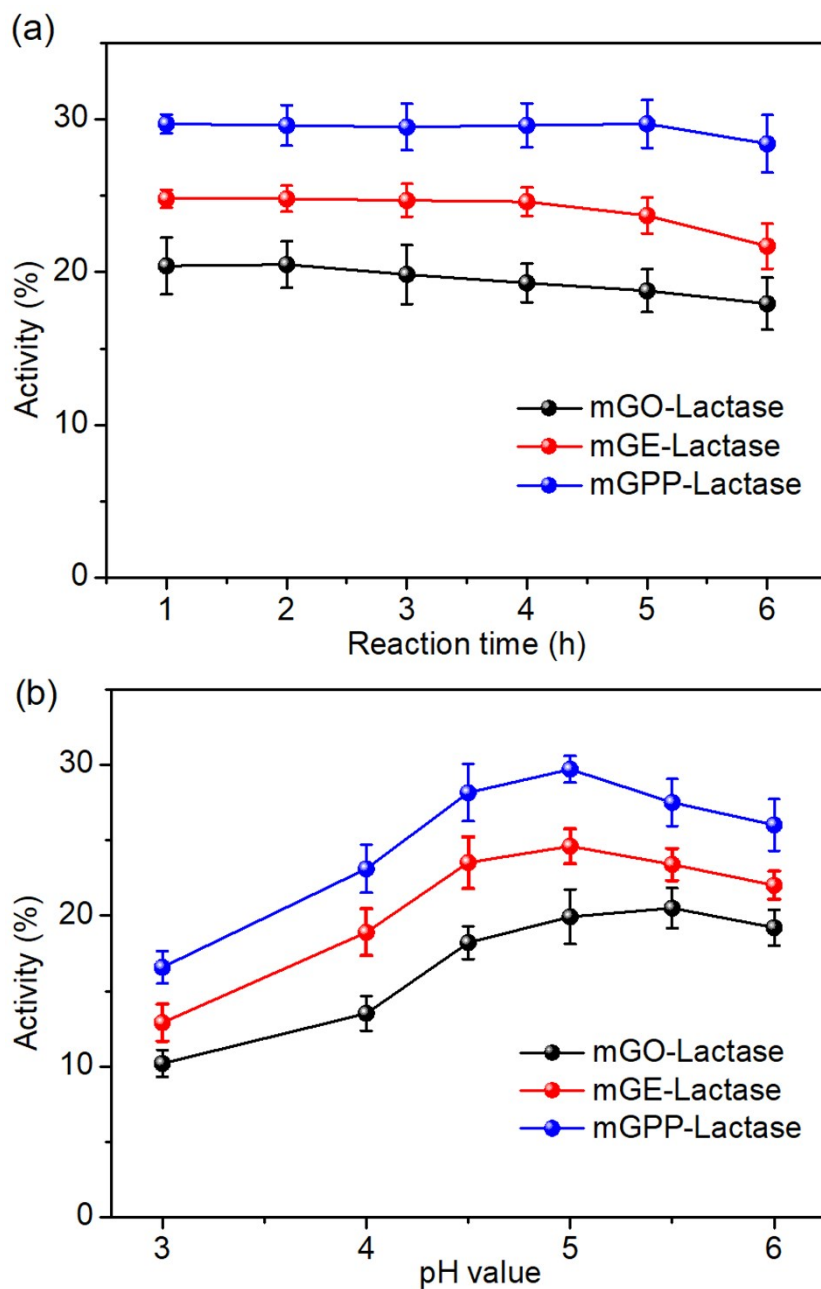

**Fig. S8** (a) Effect of reaction time on activities of mGO-Lactase, mGE-Lactase, and mGPP-Lactase, the invariant pH value is 5.0, (b) effect of pH condition on activities of mGO-Lactase, mGE-Lactase, and mGPP-Lactase, the invariant temperature is 30 °C.

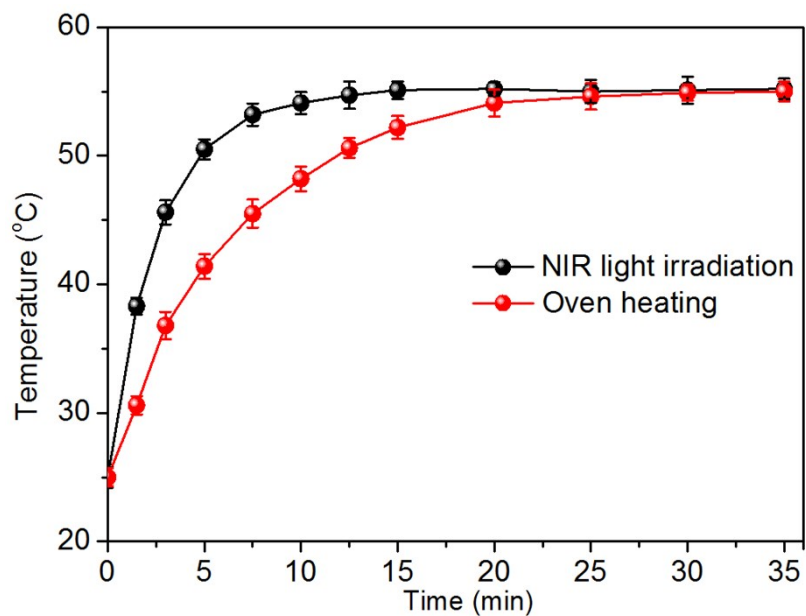

**Fig. S9** The temperature change curves of mGPP-Lactase aqueous solution in the case of NIR light irradiation or external heating (heat oven) approach.

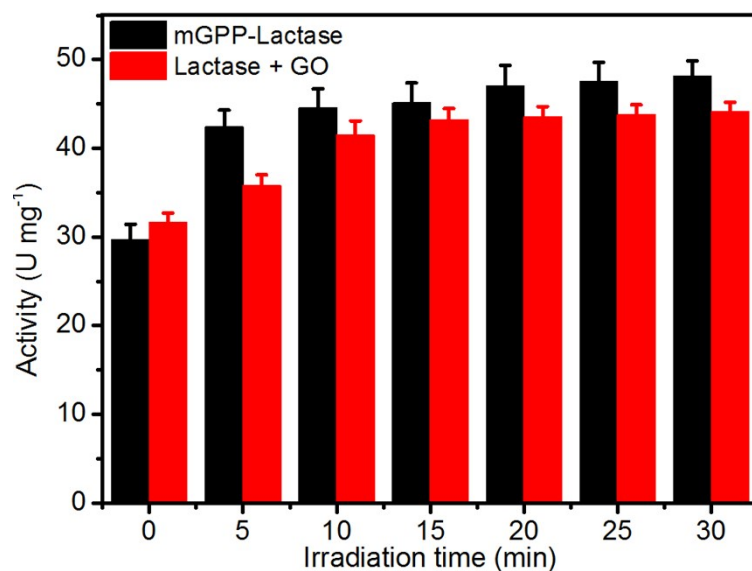

**Fig. S10** Activities of mGPP and free lactase (in the presence of GO) under NIR light irradiation for different times.
